# Supplementary material for: Translational study reveals a two-faced role of RBM3 in pancreatic cancer and suggests its potential value as a biomarker for improved patient stratification
Source: PubMed Central journal article supplement (PMC5814204; doi:10.18632/oncotarget.23486), 2017-12-15
Supplement: oncotarget-09-6188-s001.pdf [file oncotarget-09-6188-s001.pdf]

## Translational study reveals a two-faced role of RBM3 in pancreatic cancer and suggests its potential value as a biomarker for improved patient stratification

### SUPPLEMENTARY MATERIALS

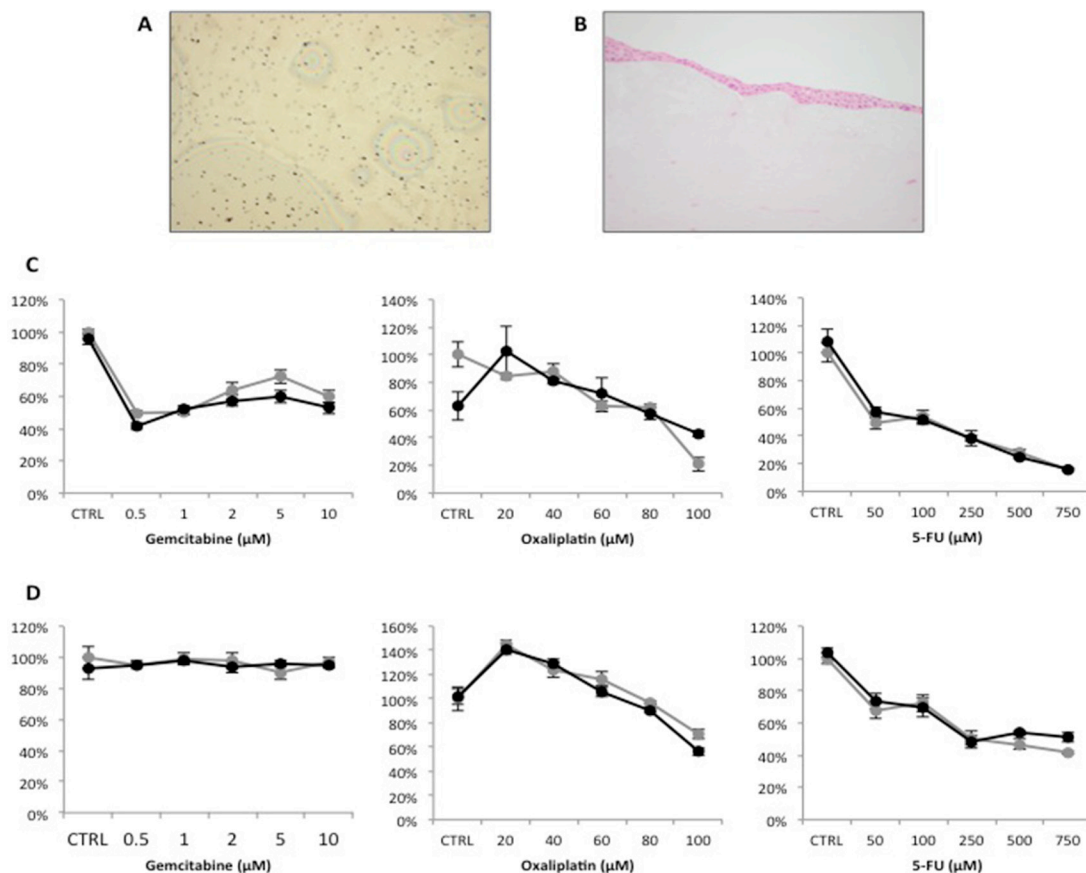

**Supplementary Figure 1: Migration and chemotherapy response of pancreatic cancer cells.** (A) Transwell migration of non-transfected MIAPaCa-2 cells after 14 h incubation. No cells migrated across the membrane, and transfected cells displayed the same results. (B) Organotypic gel section after 7 days incubation and stained with hematoxylin and eosin. Non-transfected BxPC-3 cells display no invasion and a clear border between the tumor epithelium on top and the gel. Cells transfected with RBM3 generated the same results. (C–D). Graphs represent response to chemotherapy for transfected cells (black lines) and control (grey lines). BxPC-3 cells (C) and PANC-1 cells (D) were treated with indicated doses of gemcitabine, oxaliplatin or 5-FU for 72 h.

**Supplementary Table 1: Unadjusted and adjusted hazard ratios for death within 5 years in the entire cohort, intestinal type and pancreatobiliary type tumors.** See Supplementary\_Table\_1

**Supplementary Table 2: Unadjusted and adjusted hazard ratios for recurrence in the entire cohort, intestinal type and pancreatobiliary type tumors.** See Supplementary\_Table\_2
